# Supplementary material for: Global Comparison of Drug Resistance Mutations After First-Line Antiretroviral Therapy Across Human Immunodeficiency Virus-1 Subtypes
Source: PubMed Central journal article supplement — Open Forum Infect Dis. 2015 Nov 3;3(2):ofv158. doi: 10.1093/ofid/ofv158 (PMC4943563; doi:10.1093/ofid/ofv158), 2015-11-03
Supplement: supp_ofv158_ofv158supp_fig1.pdf [file supp_ofv158_ofv158supp_fig1.pdf]

**A**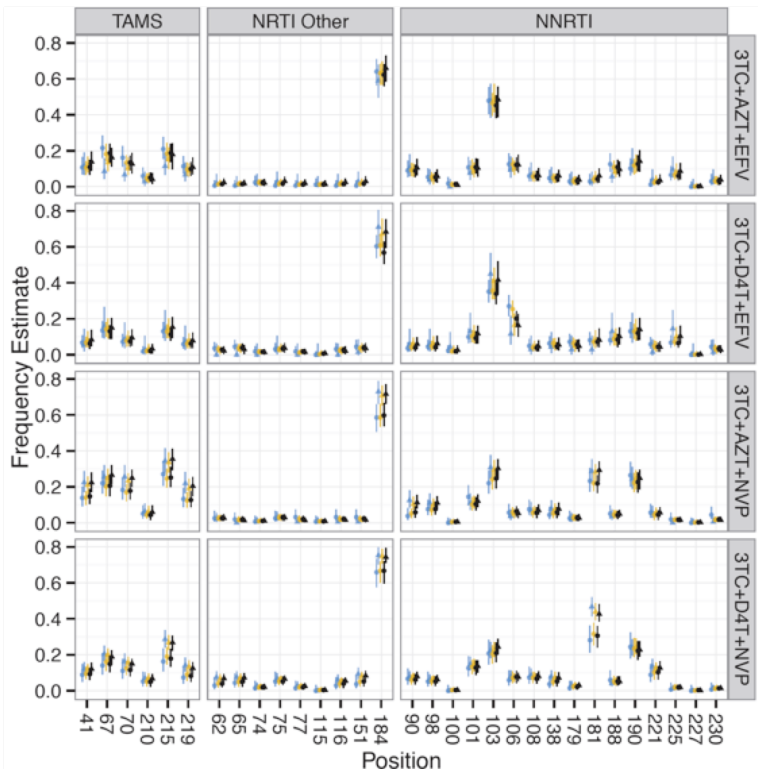**B**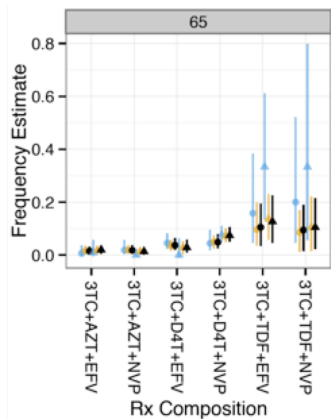**Treatment Duration**

- $\leq 1$  year
- $> 1$  year

**Estimate**

- Raw Count (Agresti-Coull Interval)
- Unadjusted Marginal Estimate
- Adjusted Marginal Estimate
