# Supplementary material for: Global Comparison of Drug Resistance Mutations After First-Line Antiretroviral Therapy Across Human Immunodeficiency Virus-1 Subtypes
Source: PubMed Central journal article supplement — Open Forum Infect Dis. 2015 Nov 3;3(2):ofv158. doi: 10.1093/ofid/ofv158 (PMC4943563; doi:10.1093/ofid/ofv158), 2015-11-03
Supplement: supp_ofv158_ofv158supp_fig2.pdf [file supp_ofv158_ofv158supp_fig2.pdf]

**A**

Frequency Difference Between Rx Combinations

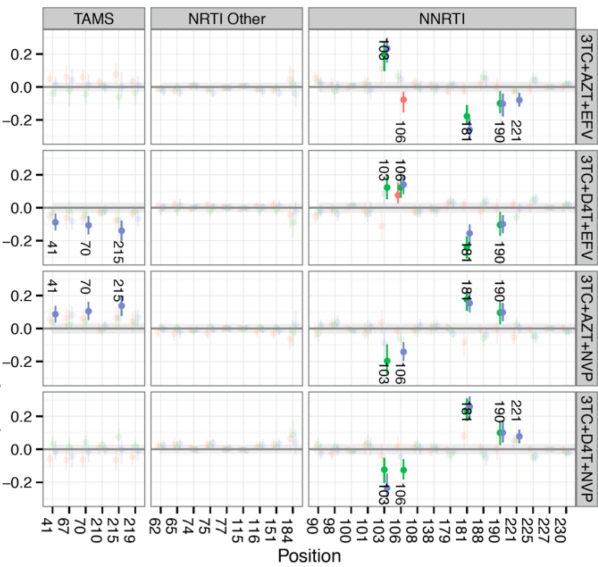**B**

Frequency Difference Between Rx Combinations

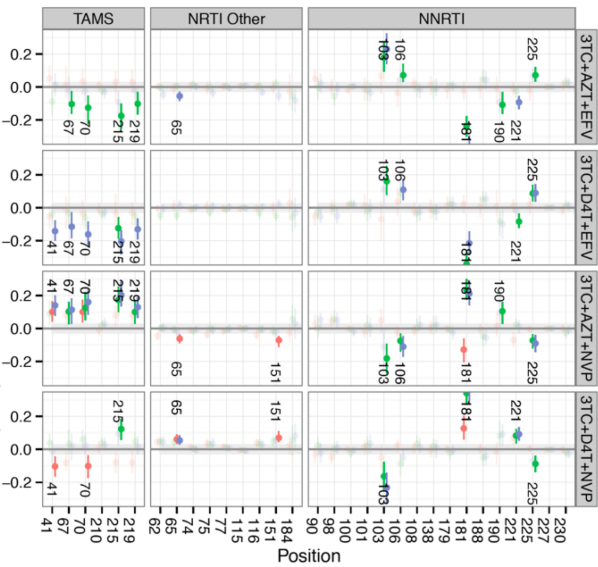**Regimen Difference**

- Different NRTI
- Different NNRTI
- Different NRTI+NNRTI
