# Supplementary figures and images for: Global Comparison of Drug Resistance Mutations After First-Line Antiretroviral Therapy Across Human Immunodeficiency Virus-1 Subtypes
Source: PubMed Central journal article supplement — Open Forum Infect Dis. 2015 Nov 3;3(2):ofv158. doi: 10.1093/ofid/ofv158 (PMC4943563; doi:10.1093/ofid/ofv158), 2015-11-03

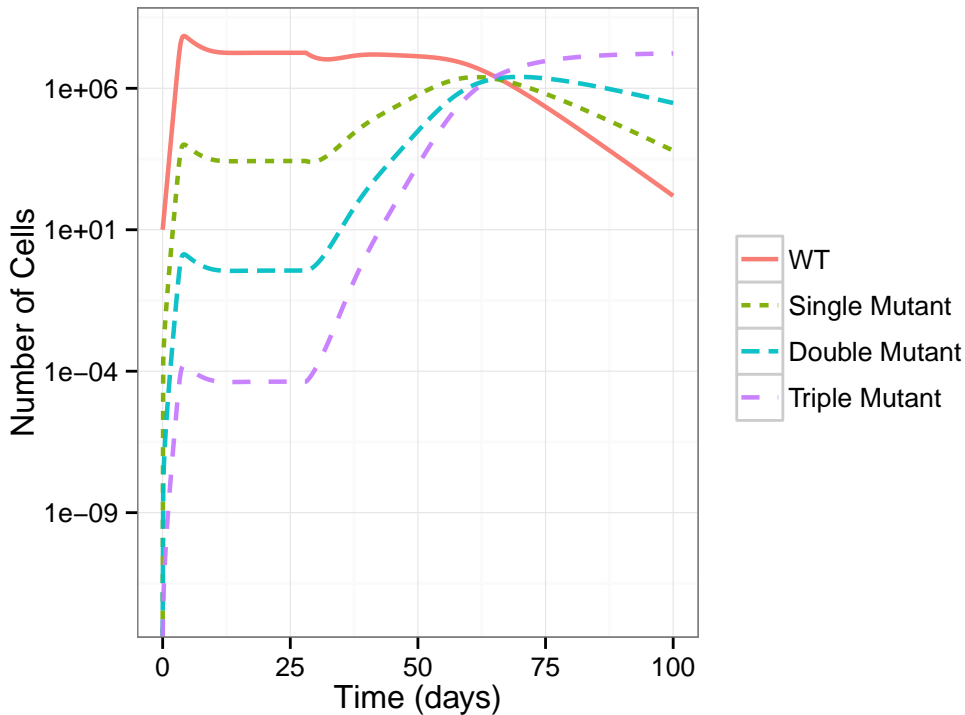

Supplement: supp_ofv158_ofv158supp_fig3.pdf [file supp_ofv158_ofv158supp_fig3.pdf]
